# Supplementary material for: Identifying diverse metal oxide nanomaterials with lethal effects on embryonic zebrafish using machine learning
Source: publisher site journal article supplement (doi:10.3762/bjnano.12.97), 2021-11-29
Supplement: Additional file 2 [file George2011_Ext_Test_2.xlsx]

## Sheet: Sheet1
Core Atomic Composition	120 hpf evaluation_TOTAL_M_effect_loel (ppm)
aluminum oxide [Al2O3]	N/A
zinc oxide [ZnO]	25
silicon dioxide [SiO2]	N/A
