# Supplementary material for: Identifying diverse metal oxide nanomaterials with lethal effects on embryonic zebrafish using machine learning
Source: publisher site journal article supplement (doi:10.3762/bjnano.12.97), 2021-11-29
Supplement: Additional file 2 [file Kleandrova2014_Ext_Test_3.xlsx]

## Sheet: Sheet1
NP	Core Atomic Composition	Chemical	Endpoint Description (units)	Endpoint Value	Endpoint Toxicity Classification	Biological test system	timepoint (hours)	Primary Experimental Reference Cited by Kleandrova et al. (2014)	Primary Experimental Reference URL
41	iron oxide [Fe2O3]	Fe2O3	LC50 (uM)	334.085	1	Danio rerio (embryos)	168	Plos One 2012; 7 (9) e46286	https://doi.org/10.1371/journal.pone.0046286
66	zinc oxide [ZnO]	ZnO	LC50 (uM)	22.0249	-1	Danio rerio (embryos)	96	J. Environ. Sci. Health A Tox. Hazard Subst. Environ. Eng. 2008; 43 (3) 278-284	https://doi.org/10.1080/10934520701792779
