# Supplementary material for: Identifying diverse metal oxide nanomaterials with lethal effects on embryonic zebrafish using machine learning
Source: publisher site journal article supplement (doi:10.3762/bjnano.12.97), 2021-11-29
Supplement: Additional file 2 [file Kovriznych2013_Ext_Test_4.xlsx]

## Sheet: Sheet2
Sample Name	Comment [nanomaterial]	Core Atomic Composition	96_hours_LC50_or_lower_limit_ppm	Comment [sample Timepoint (hours)]	Measurement Value [mean(LC50)]	Unit	Term Accession Number	Term Source Ref	Measurement Value [Greater Than(LC50)]	Unit	Term Accession Number	Term Source Ref
s_10.2478_FS_intox-2013-0012_InVivo_derived:181,182,183,184,185	Bi2O3_10.2478_FS_intox-2013-0012	Bi2O3	1600	96		milligram per liter	http://purl.obolibrary.org/obo/UO_0000273	UO	1600	milligram per liter	http://purl.obolibrary.org/obo/UO_0000273	UO
s_10.2478_FS_intox-2013-0012_InVivo_derived:201,202,203,204,205	CaO_10.2478_FS_intox-2013-0012	CaO	290	96	290	milligram per liter	http://purl.obolibrary.org/obo/UO_0000273	UO		milligram per liter	http://purl.obolibrary.org/obo/UO_0000273	UO
s_10.2478_FS_intox-2013-0012_InVivo_derived:216,217,218,219,220	Cr2O3_10.2478_FS_intox-2013-0012	Cr2O3	1600	96		milligram per liter	http://purl.obolibrary.org/obo/UO_0000273	UO	1600	milligram per liter	http://purl.obolibrary.org/obo/UO_0000273	UO
s_10.2478_FS_intox-2013-0012_InVivo_derived:221,222,223,224,225	CuO_10.2478_FS_intox-2013-0012	copper oxide [CuO]	840	96	840	milligram per liter	http://purl.obolibrary.org/obo/UO_0000273	UO		milligram per liter	http://purl.obolibrary.org/obo/UO_0000273	UO
s_10.2478_FS_intox-2013-0012_InVivo_derived:236,237,238,239,240	Fe2O3_10.2478_FS_intox-2013-0012	iron oxide [Fe2O3]	1600	96		milligram per liter	http://purl.obolibrary.org/obo/UO_0000273	UO	1600	milligram per liter	http://purl.obolibrary.org/obo/UO_0000273	UO
s_10.2478_FS_intox-2013-0012_InVivo_derived:246,247,248,249,250	MgO_10.2478_FS_intox-2013-0012	MgO	3200	96		milligram per liter	http://purl.obolibrary.org/obo/UO_0000273	UO	3200	milligram per liter	http://purl.obolibrary.org/obo/UO_0000273	UO
s_10.2478_FS_intox-2013-0012_InVivo_derived:256,257,258,259,260	NiO_10.2478_FS_intox-2013-0012	NiO	1300	96		milligram per liter	http://purl.obolibrary.org/obo/UO_0000273	UO	1300	milligram per liter	http://purl.obolibrary.org/obo/UO_0000273	UO
s_10.2478_FS_intox-2013-0012_InVivo_derived:281,282,283,284,285	SiO2_10.2478_FS_intox-2013-0012	silicon dioxide [SiO2]	1600	96		milligram per liter	http://purl.obolibrary.org/obo/UO_0000273	UO	1600	milligram per liter	http://purl.obolibrary.org/obo/UO_0000273	UO
s_10.2478_FS_intox-2013-0012_InVivo_derived:286,287,288,289,290	SnO2_10.2478_FS_intox-2013-0012	SnO2	1600	96		milligram per liter	http://purl.obolibrary.org/obo/UO_0000273	UO	1600	milligram per liter	http://purl.obolibrary.org/obo/UO_0000273	UO
s_10.2478_FS_intox-2013-0012_InVivo_derived:296,297,298,299,300	TiO2_10.2478_FS_intox-2013-0012	titanium dioxide [TiO2]	1600	96		milligram per liter	http://purl.obolibrary.org/obo/UO_0000273	UO	1600	milligram per liter	http://purl.obolibrary.org/obo/UO_0000273	UO
s_10.2478_FS_intox-2013-0012_InVivo_derived:301,302,303,304,305	WO3_10.2478_FS_intox-2013-0012	WO3	1600	96		milligram per liter	http://purl.obolibrary.org/obo/UO_0000273	UO	1600	milligram per liter	http://purl.obolibrary.org/obo/UO_0000273	UO
