# Supplementary material for: Identifying diverse metal oxide nanomaterials with lethal effects on embryonic zebrafish using machine learning
Source: publisher site journal article supplement (doi:10.3762/bjnano.12.97), 2021-11-29
Supplement: Additional file 2 [file NBI_Ext_Test_1.xlsx]

## Sheet: Sheet1
In Model Dev Set?	NBI Material Identifier	Particle Descriptor	Material Type	Synthesis Process	Synthesis Precursors	Purity	Types of Impurities	Primary Particle Size: Avg. (nm)	Primary Particle Size: Min. (nm)	Primary Particle Size: Max (nm)	Core Shape	Core Structure	Core Atomic Composition	Number of Core Atoms	Mass Core Atoms (ng)	Shell Composition	Shell Surface Shape	Shell Linkage	Outermost Surface Functional Groups	Surface Chemistry Linkage Group / Type	Density of Surface Covered with Ligands (%)	Minimum Number of Ligands	Maximum Nunber of Ligands	Mass of Core + Shell + Linkages and Ligands (ng)	Surface Area (Core + Shell + Ligands) (mm2)	Surface Charge: (positive, negative, neutral)	Surface Charge: Value	Primary Exposure Route	Primary Exposure Delivery	Secondary Exposure Route	Secondary Exposure Delivery	Exposure Organism	Exposure Organism Life stage	Duration of Exposure (hours)	Exposure Organism Gender	Exposure Organism Average Weight (mg)	Exposure Organism Initial Age (hours post-fertilization at start of exposure)	Continuity of Exposure	Exposure Temperature (Celsius)	Exposure Media	120 hpf evaluation_M_effect_loel	Maximum dosage tested (ppm)
N	165	3% Mn doped TiO2	metal oxide	sol-gel		unknown		11	11	11	irregular-angular	solid 3% Mn doped	titanium dioxide [TiO2]; manganese [mn]			none	none	none	none	none	none	none	none			unknown		dermal	waterborne	oral	waterborne	zebrafish	embryo	112	mixed	1	8	Continuous	26.5	fish water	N/A	250
N	164	1% Mn doped TiO2	metal oxide	sol-gel		unknown		11	11	11	irregular-angular	solid, 1% Mn doped	titanium dioxide [TiO2]; manganese [mn]			none	none	none	none	none	none	none	none			unknown		dermal	waterborne	oral	waterborne	zebrafish	embryo	112	mixed	1	8	Continuous	26.5	fish water	N/A	250
N	130	5% Fe Doped ZnO (Q007)	metal oxide	prepared in ethanol		unknown		4	4	4	unknown	unknown	zinc oxide [ZnO]			none	none	none	ferric oxide	unknown	unknown	unknown	unknown			unknown		dermal	waterborne	oral	waterborne	zebrafish	embryo	112	mixed	1	8	Continuous		fish water	N/A	100
N	129	ZnO Prepared in DEG (NM005)	metal oxide	prepared in DEG		unknown		4	4	4	unknown	unknown	zinc oxide [ZnO]			none	none	none	none	none	none	none	none			positive		dermal	waterborne	oral	waterborne	zebrafish	embryo	112	mixed	1	8	Continuous		fish water	N/A	200
N	128	Iron Oxide Prepared in EtOH (Q009)	metal oxide	prepared in ethanol		unknown		110	110	110	unknown	unknown	iron oxide [Fe2O3]			none	none	none	none	none	none	none	none			negative		dermal	waterborne	oral	waterborne	zebrafish	embryo	112	mixed	1	8	Continuous		fish water	N/A	220
N	127	ZnO Prepared in EtOH (Q002)	metal oxide	prepared in ethanol		unknown		4.7	3.9	5.5	unknown	unknown	zinc oxide [ZnO]			none	none	none	none	none	none	none	none			negative	-8	dermal	waterborne	oral	waterborne	zebrafish	embryo	112	mixed	1	8	Continuous		fish water	N/A	120
N	87	Aldrich ZnO (TLAD24A)	metal oxide			unknown					unknown	unknown	zinc oxide [ZnO]			none	none	none	none	none	none	none	none			unknown		dermal	waterborne	oral	waterborne	zebrafish	embryo	112	mixed	1	8	Continuous		fish water	N/A	250
